# Supplementary material for: Pyrroloquinoline quinone disodium salt improves brain function in both younger and older adults
Source: Royal Society of Chemistry journal article supplement (doi:10.1039/d2fo01515c), 2023-01-01
Supplement: d2fo01515c2.xlsx [file d2fo01515c2.xlsx]

## Sheet: Read Me
This test was funded by Mitsubishi Gas Chemical Company.
All rights to this data are owned by Mitsubishi Gas Chemical Company, Inc.
Analysis, research, papers, and presentations using this data require approval from Mitsubishi Gas Chemical.
contact address
Mitsubishi Gas Chemical Company, Inc. Life Science Department
study director
Tomomi Suzuki
tomomi-suzuki@mgc.co.jp

## Sheet: TestMember
no		SCR_ID	test_ID	age	gender	target_class		no		SCR_ID	test_ID	age	gender	target_class
1	1	25	1	56	female	A		1	2	27	22	36	male	B
2	1	48	3	20	male	A		2	2	28	23	34	male	B
3	1	79	4	50	female	A		3	2	14	24	40	male	B
4	1	18	5	38	female	A		4	2	67	25	32	female	B
5	1	36	7	45	female	A		5	2	74	26	44	female	B
6	1	32	8	47	female	A		6	2	21	27	36	female	B
7	1	52	9	33	male	A		7	2	26	28	53	male	B
8	1	59	10	22	female	A		8	2	19	29	49	male	B
9	1	68	11	52	female	A		9	2	71	30	29	female	B
10	1	41	12	44	male	A		10	2	22	31	26	male	B
11	1	43	13	44	male	A		11	2	35	33	27	female	B
12	1	63	14	33	female	A		12	2	42	34	32	male	B
13	1	65	15	35	female	A		13	2	61	36	39	female	B
14	1	78	16	38	female	A		14	2	64	37	42	female	B
15	1	54	18	45	female	A		15	2	8	38	36	female	B
16	1	70	19	31	male	A		16	2	16	39	47	female	B
17	1	72	20	48	female	A		17	2	40	40	20	male	B
18	1	76	21	45	female	A		18	2	51	41	59	female	B
19	1	82	43	64	female	A		19	2	77	42	42	male	B
20	1	83	44	22	female	A		20	2	86	57	56	male	B
21	1	87	45	59	male	A		21	2	91	58	22	female	B
22	1	88	46	22	male	A		22	2	122	60	27	male	B
23	1	102	47	57	female	A		23	2	106	62	61	female	B
24	1	80	48	60	male	A		24	2	108	63	20	female	B
25	1	94	49	21	female	A		25	2	110	64	23	female	B
26	1	116	50	20	female	A		26	2	113	65	56	female	B
27	1	97	51	58	male	A		27	2	120	66	56	female	B
28	1	100	52	57	female	A		28	2	123	67	51	female	B
29	1	101	53	22	female	A		29	2	125	68	64	male	B
30	1	104	54	55	female	A		30	2	118	69	61	male	B
31	1	124	56	53	male	A		31	2	119	70	56	male	B

## Sheet:  Biochem2
	CODE		Background information		Specimen information						biochemical test
											TG			T-cho			BUN (urea nitrogen)			T-Bil (total bilirubin)			TP (total protein)			Alb (albumin)			ALP			LDH			γ-GTP			AST			ALT			Crea (creatinine)			UA
					Hemolysis			chyle			mg/dL			mg/dL			mg/dL			mg/dL			g/dL			mg/dL			U/L			U/L			U/L			U/L			U/L			mg/dL			mg/dL
											50 to 149			150 to 219			8.0 to 22.0			0.3 to 1.2			6.7-8.3			3.8-5.2			115-359			115 to 245			M=70 or less F=30 or less			10 to 40			5 to 40			M=0.61～1.04 F=0.47～0.79			M=3.7～7.0 F=2.5～7.0
item number	SCR ID	Main exam ID	age	sex1=male 2=female	0W	8W	12W	0W	8W	12W	SCR	8W	12W	SCR	8W	12W	SCR	8W	12W	SCR	8W	12W	SCR	8W	12W	SCR	8W	12W	SCR	8W	12W	SCR	8W	12W	SCR	8W	12W	SCR	8W	12W	SCR	8W	12W	SCR	8W	12W	SCR	8W	12W
1	082	043	64	2	-	-	-	-	-	-	48	45	47	204	208	201	11.2	13.8	14.5	0.8	0.7	0.7	6.9	7	6.8	4.3	4.4	4.3	224	236	218	161	156	154	16	17	14	23	19	19	20	14	16	0.6	0.66	0.66	3.5	4.3	4.3
2	083	044	22	2	-	-	-	-	-	-	65	68	58	170	166	160	20.3	11.9	16.9	0.4	0.6	0.5	7.4	7	7.2	4.4	4.3	4.4	153	128	130	149	130	140	12	13	13	16	16	15	12	13	13	0.55	0.56	0.54	4	4.7	4.1
3	087	045	59	1	-	-	-	-	-	-	39	36	35	193	180	162	16	18.2	13	1.4	0.9	0.9	7	6.8	6.5	4.4	4.3	4.2	251	256	247	153	156	147	33	28	23	17	19	16	14	12	12	0.76	0.81	0.8	4.5	5.4	4.1
4	088	046	22	1	-	-	-	-	-	-	67	120	53	121	140	151	9.1	10.5	14.1	0.9	0.8	0.4	7.6	7	7	4.7	4.5	4.5	235	230	230	200	193	158	20	19	17	23	26	20	15	20	13	0.66	0.67	0.62	5.9	5.3	6.4
5	102	047	57	2	-	-	-	-	-	-	118	52	64	226	224	249	11.3	13.5	12	0.7	0.8	0.8	6.8	6.9	7.2	4.3	4.3	4.5	254	250	255	159	169	165	25	21	21	24	28	23	16	16	16	0.53	0.55	0.49	3.5	3.9	3.4
6	080	048	60	1	-	-	-	-	-	-	50	66	58	188	200	176	12.7	15.5	15.3	0.6	0.6	0.6	8.2	7.6	7.4	4.9	4.8	4.8	171	164	137	172	161	147	20	21	15	18	21	18	18	23	17	0.85	0.89	0.86	5.9	5.8	5.4
7	094	049	21	2	-	-	-	-	-	-	43	25	45	209	198	211	12.1	13.5	15.1	0.7	0.8	0.4	7.6	7.2	7.3	4.8	4.7	4.7	181	164	185	136	142	142	12	10	10	18	19	18	12	12	13	0.59	0.58	0.63	5.2	5.1	4.2
8	116	050	20	2	-	-	-	-	-	-	38	47	46	174	206	203	8.4	9.1	7.7	0.5	0.6	0.5	6.8	7.7	7.5	4.2	4.7	4.5	227	256	247	157	150	152	8	10	10	14	17	16	8	9	10	0.43	0.47	0.46	3.9	4.3	4.6
9	097	051	58	1	-	-	-	-	-	-	134	149	134	245	233	237	9.4	12.2	10.7	1	0.9	0.8	6.8	7	7.1	4.3	4.3	4.5	188	198	206	176	164	187	80	91	95	31	36	44	23	31	33	0.8	0.82	0.83	7.1	7.6	7.8
10	100	052	57	2	-	-	-	-	-	-	50	68	67	237	235	242	14.1	14.3	14.6	0.9	0.9	0.8	6.9	6.4	6.7	4.2	3.8	3.9	205	175	195	219	201	199	25	31	31	21	23	23	19	26	27	0.55	0.55	0.53	4.5	4.6	4.7
11	101	053	22	2	-	-	-	-	-	-	42	65	46	205	220	205	12.2	12.1	11.6	0.6	0.6	0.4	7.3	7.4	7.5	4.7	4.5	4.5	137	125	167	152	144	153	10	11	13	18	18	16	13	13	12	0.7	0.73	0.69	4.5	5.2	4.8
12	104	054	55	2	-	-	-	-	-	-	70	75	59	224	229	217	8.9	9.3	9.5	0.6	0.7	0.4	7.6	7.4	7.6	4.7	4.5	4.5	175	157	187	206	189	192	31	24	28	22	20	24	22	21	27	0.53	0.51	0.52	4.9	4.5	4.6
13	112	055	61	1	-	-	-	-	-	-	126	115	97	172	166	157	17.2	19.3	18.4	1	1.1	1	7.5	7.2	7.2	4.6	4.4	4.4	245	227	231	263	248	230	148	119	113	44	36	31	28	20	20	0.75	0.78	0.76	6.5	6.9	7.2
14	124	056	53	1	-	-	-	-	-	-	49	66	49	218	202	214	11.7	11.2	10.4	0.6	0.5	0.5	7.8	7.5	7.6	4.9	4.6	4.5	253	248	290	167	171	170	16	16	14	16	25	20	10	17	12	0.77	0.74	0.74	6.2	6.3	6.1
15	086	057	56	1	-	-	-	-	-	-	57	56	68	234	222	219	12.6	19.2	17.2	1	1.1	1.3	7.6	7.4	7.3	4.2	4.2	4.2	175	168	156	153	138	137	18	15	18	25	18	19	25	16	16	0.81	0.77	0.83	6.7	6.6	6.3
16	091	058	22	2	-	-	-	-	-	-	36	52	31	187	202	177	9.9	6.9	9.6	0.7	0.4	0.5	7.5	7.4	7.1	4.5	4.4	4.3	188	215	197	165	150	155	21	22	21	25	20	17	20	17	10	0.56	0.57	0.57	4.8	3.6	4
17	115	059	57	1	-	-	-	-	-	-	81	68	70	223	234	250	7.5	9.8	11.5	0.9	0.6	0.7	7.2	7.2	7.5	4.7	4.6	4.6	154	164	178	231	236	232	17	19	19	25	27	27	19	23	24	0.92	0.87	0.93	3.9	3.7	4.7
18	122	060	27	1	-	-	-	-	-	-	39	75	83	168	163	151	12	9.6	9.8	1	0.9	0.8	7.4	7	6.9	5	4.7	4.5	257	213	210	141	129	132	24	23	22	20	18	19	16	14	24	0.73	0.69	0.65	5	5.1	4.9
19	099	061	60	1	-	-	-	-	-	-	53	98	71	205	256	227	19.3	26	20	1	0.7	0.7	7.1	7.1	6.9	4	3.9	3.9	144	176	154	147	133	129	15	14	14	22	19	19	21	17	16	0.73	0.79	0.77	4.1	4.4	3.7
20	106	062	61	2	-	-	-	-	-	-	50	41	50	248	226	219	17.7	16.8	15	0.7	0.8	0.6	7.1	6.7	6.9	4.6	4.2	4.3	210	222	226	190	187	189	20	19	21	22	34	28	17	27	25	0.76	0.71	0.67	5	4.1	4.7
21	108	063	20	2	-	-	-	-	-	-	58	47	105	186	170	158	10.4	10.1	8	1.1	1	1.4	7.9	7.4	7.1	4.9	4.5	4.4	130	128	106	191	174	167	19	15	15	25	22	22	14	11	12	0.54	0.51	0.53	4.3	3.6	3.6
22	110	064	23	2	-	-	-	-	-	-	96	67	95	167	185	185	6.5	6.4	8	0.9	0.9	0.7	7.5	7.5	7.3	4.6	4.6	4.4	194	188	179	124	132	137	12	14	14	14	15	18	12	13	21	0.51	0.49	0.48	4.3	4.2	4.2
23	113	065	56	2	-	-	-	-	-	-	68	108	65	184	183	166	12.3	11.5	14.2	0.7	0.6	0.7	7.3	6.8	6.6	4.8	4.4	4.3	274	285	254	141	142	134	22	20	17	18	18	18	14	12	13	0.65	0.64	0.61	5.5	5.5	5.5
24	120	066	56	2	-	-	-	-	-	-	76	73	43	212	200	207	12.7	13.7	12	0.5	0.9	1.2	7.3	6.6	7	4.5	4.3	4.6	215	163	148	209	212	199	64	55	34	23	39	26	15	38	20	0.62	0.62	0.65	4.5	4.1	4
25	123	067	51	2	-	-	-	-	-	-	83	60	77	232	217	216	10	11.6	10.9	0.6	0.4	0.5	8	7.4	7.4	4.9	4.5	4.5	110	108	112	188	163	170	19	16	16	20	17	18	14	12	13	0.6	0.63	0.61	4.9	5	5.4
26	125	068	64	1	-	-	-	-	-	-	37	37	46	219	196	195	13.9	14.3	14	0.6	0.5	0.6	7.4	6.9	6.9	4.4	4.2	4.2	173	174	169	179	176	160	20	18	14	22	24	20	17	19	14	0.79	0.86	0.82	4.5	4.6	4.4
27	118	069	61	1	-	-	-	-	-	-	39	61	46	178	182	165	12.7	12.8	13.1	0.8	0.7	0.8	7.4	6.8	6.5	4.6	4.3	3.9	213	187	172	205	180	190	21	19	18	25	23	25	24	24	18	0.9	0.9	0.87	5.7	5	5.3
28	119	070	56	1	-	-	-	-	-	-	156	187	118	192	206	174	10.2	11.8	12.7	0.9	0.7	0.8	7.4	7.4	7.4	4.5	4.5	4.4	225	241	264	150	138	166	27	24	29	18	18	21	9	12	12	0.71	0.8	0.86	5	6.3	5.6
[truncated: 15 more columns]

## Sheet:  Blood 2
	CODE		Background information		Hematology test
					WBC (white blood cell count)			RBC (red blood cell count)			Hb (hemoglobin)	M=13.5～17.6F=11.3～15.2		Ht (hematocrit value)	M=39.8~51.8F=33.4~44.9		MCV			MCHMore			MCHC			PLT (platelet count)	13.0 to 36.9	13.0 to 36.9
					/µL	/µL		×10^4/µL	×10^4/µL		g/dL	g/dL		%	%		fl			pg			%			×10^4/µL	×10^4/µL	×10^4/µL
					M=3900～9800 F=3500～9100			M=427～570 F=376～500			M=13.5～17.6F=11.3～15.2			M=39.8~51.8F=33.4~44.9			M=82.7~101.6 F=79.0~100.0			M=28.0~34.6F=26.3~34.3			M=31.6～36.6 F=30.7～36.6			M13.1~36.2 F=13.0~36.9
item number	0W ID	Main exam ID	age	sex1=male 2=female	0W	8W	12W	0W	8W	12W	0W	8W	12W	0W	8W	12W	0W	8W	12W	0W	8W	12W	0W	8W	12W	0W	8W	12W
1	082	043	64	2	4800	5100	4400	427	445	434	13.6	14	13.5	41.4	42.6	41.3	97	95.7	95.2	31.9	31.5	31.1	32.9	32.9	32.7	21	22.5	23.4
2	083	044	22	2	7900	6000	6000	461	470	465	12.3	12	11.9	39.2	38	38.1	85	80.9	81.9	26.7	25.5	25.6	31.4	31.6	31.2	31.2	30.2	31.1
3	087	045	59	1	4800	5600	9000	449	437	436	15.5	14.9	14.4	45.9	44.6	43.8	102.2	102.1	100.5	34.5	34.1	33	33.8	33.4	32.9	28.3	28.5	31.1
4	088	046	22	1	5700	4500	4100	513	508	523	15.8	15.8	15.7	47.5	48.1	50.1	92.6	94.7	95.8	30.8	31.1	30	33.3	32.8	31.3	29.4	28.5	24.3
5	102	047	57	2	5200	5400	5600	457	467	496	13.2	13.7	14.3	40.5	42.3	44	88.6	90.6	88.7	28.9	29.3	28.8	32.6	32.4	32.5	27.1	25.4	26.1
6	080	048	60	1	3400	4200	4100	502	473	459	15.5	14.4	13.8	47.3	44.8	43.3	94.2	94.7	94.3	30.9	30.4	30.1	32.8	32.1	31.9	21.8	21.5	20.2
7	094	049	21	2	7100	6200	8500	479	451	491	13.8	12.7	13.5	42.8	39.2	43.4	89.4	86.9	88.4	28.8	28.2	27.5	32.2	32.4	31.1	23.5	25.3	24.4
8	116	050	20	2	5600	9800	9600	358	460	465	11.2	14	14.2	33.9	43.1	42.6	94.7	93.7	91.6	31.3	30.4	30.5	33	32.5	33.3	28.2	32.5	35.7
9	097	051	58	1	6200	5600	7300	410	433	426	13.4	14.2	13.7	40.6	43.1	42.2	99	99.5	99.1	32.7	32.8	32.2	33	32.9	32.5	27.3	30.4	33
10	100	052	57	2	4100	3800	4500	412	395	406	12.6	12	12	39.2	37.6	38.6	95.1	95.2	95.1	30.6	30.4	29.6	32.1	31.9	31.1	25.9	24.6	25.8
11	101	053	22	2	6500	5700	5200	423	426	440	13.2	13	13.7	39.9	40.8	41.9	94.3	95.8	95.2	31.2	30.5	31.1	33.1	31.9	32.7	27.8	29.9	29.8
12	104	054	55	2	6300	4500	4900	469	462	481	14	13.7	13.8	42	43.2	44	89.6	93.5	91.5	29.9	29.7	28.7	33.3	31.7	31.4	45.9	47.8	46.9
13	112	055	61	1	4900	4600	5100	453	442	423	14.5	14.2	13.7	45.1	45.7	43.1	99.6	103.4	101.9	32	32.1	32.4	32.2	31.1	31.8	25.1	25.8	27.5
14	124	056	53	1	7200	4700	5400	435	447	434	13.5	13.9	13.1	40.5	42.7	40.9	93.1	95.5	94.2	31	31.1	30.2	33.3	32.6	32	21.1	19.9	24
15	086	057	56	1	4800	3500	4200	481	465	464	15.2	14.5	14.4	46.8	45.3	44.5	97.3	97.4	95.9	31.6	31.2	31	32.5	32	32.4	21	20.3	20.4
16	091	058	22	2	6000	6200	5600	432	462	410	12.7	13.7	12	39.6	42.7	38	91.7	92.4	92.7	29.4	29.7	29.3	32.1	32.1	31.6	26.1	30.1	30.3
17	115	059	57	1	6500	5900	6900	493	508	539	14.9	15.6	16.1	45.4	48.5	50.3	92.1	95.5	93.3	30.2	30.7	29.9	32.8	32.2	32	51.4	48.7	56.1
18	122	060	27	1	8500	9900	6000	505	518	513	16.1	17	16.3	47.2	49.2	46.9	93.5	95	91.4	31.9	32.8	31.8	34.1	34.6	34.8	26.9	26.8	33.5
19	099	061	60	1	4500	3800	5300	512	520	519	15.5	15.5	15.9	47.3	47.7	48.5	92.4	91.7	93.4	30.3	29.8	30.6	32.8	32.5	32.8	26.9	30	26.7
20	106	062	61	2	3400	3400	3000	430	403	411	13.7	13.1	13.1	42	39.8	40.7	97.7	98.8	99	31.9	32.5	31.9	32.6	32.9	32.2	21.2	19.6	20
21	108	063	20	2	6500	5700	4800	454	441	430	13.6	13.9	13.1	41.7	40.9	39.9	91.9	92.7	92.8	30	31.5	30.5	32.6	34	32.8	27.4	25.6	21.3
22	110	064	23	2	7700	6800	7500	451	419	427	13	12.4	12.5	40.7	38.8	39	90.2	92.6	91.3	28.8	29.6	29.3	31.9	32	32.1	27.2	30.7	31.3
23	113	065	56	2	5700	6100	5000	460	447	433	14.2	14.2	13.3	44.7	44.1	42.4	97.2	98.7	97.9	30.9	31.8	30.7	31.8	32.2	31.4	34.6	32.4	38.5
24	120	066	56	2	6000	4800	3500	430	403	432	12.8	12.5	12.9	40.3	38.4	40.3	93.7	95.3	93.3	29.8	31	29.9	31.8	32.6	32	32.1	24.4	22.4
25	123	067	51	2	6100	4800	5300	489	472	476	13.9	14	14	44.3	42.9	42.9	90.6	90.9	90.1	28.4	29.7	29.4	31.4	32.6	32.6	24.1	22.8	22.6
26	125	068	64	1	6600	6300	7500	434	413	426	13	12.9	12.9	40.9	38.7	39.4	94.2	93.7	92.5	30	31.2	30.3	31.8	33.3	32.7	27.9	25.7	27.3
27	118	069	61	1	6100	4400	4800	485	485	448	14.3	14.4	13.2	43.9	45	41.2	90.5	92.8	92	29.5	29.7	29.5	32.6	32	32	22.7	22.1	21.7
28	119	070	56	1	4700	4700	6100	464	476	485	14.5	15.1	15.6	43.6	44.9	45.4	94	94.3	93.6	31.3	31.7	32.2	33.3	33.6	34.4	33	33.4	33.3

## Sheet:  Urine2
	CODE		Background information		Urinalysis
					pH			specific gravity			Protein qualitative			Sugar qualitative			Urobilinogen			Occult blood reaction			biliruline			ketone bodies
					5.0-7.5			1.005 to 1.030			-			-			±			-			-			-
item number	0W ID	Main exam ID	age	sex1=male 2=female	0W	8W	12W	0W	8W	12W	0W	8W	12W	0W	8W	12W	0W	8W	12W	0W	8W	12W	0W	8W	12W	0W	8W	12W
1	082	043	64	2	6.5	6	5.5	1.007	1.005	1.013	0	0	0	0	0	0	0	0	0	0	0	0	0	0	0	0	0	0
2	083	044	22	2	5	6.5	5.5	1.034	1.015	1.034	0	0	1	0	0	0	0	0	0	0	3	0	0	0	0	0	0	0
3	087	045	59	1	5.5	5.5	5.5	1.03	1.033	1.028	1	1	1	0	0	0	0	0	0	0	0	0	0	0	0	0	0	0
4	088	046	22	1	5.5	6.5	5.5	1.019	1.015	1.029	0	0	1	0	0	0	0	0	0	0	0	0	0	0	0	0	0	0
5	102	047	57	2	6	7.5	7.5	1.022	1.021	1.006	1	0	0	0	0	0	0	0	0	0	0	0	0	0	0	0	0	0
6	080	048	60	1	7	6.5	6.5	1.008	1.014	1.014	0	0	0	0	0	0	0	0	0	0	0	0	0	0	0	0	0	0
7	094	049	21	2	6.5	7.5	7	1.028	1.032	1.027	0	1	0	0	0	0	0	0	0	0	0	0	0	0	0	0	0	0
8	116	050	20	2	5.5	7	7.5	1.025	1.028	1.021	2	1	0	0	0	0	0	0	0	4	0	0	0	0	0	0	0	0
9	097	051	58	1	6	5.5	5.5	1.014	1.007	1.007	0	0	0	0	0	0	0	0	0	0	0	0	0	0	0	0	0	0
10	100	052	57	2	7	7	6.5	1.018	1.019	1.018	0	0	0	0	0	0	0	0	0	0	0	0	0	0	0	0	0	0
11	101	053	22	2	6	6	6	1.01	1.026	1.016	0	1	0	0	0	0	0	0	0	0	0	0	0	0	0	0	0	0
12	104	054	55	2	5.5	7.5	6.5	1.008	1.006	1.005	0	0	0	0	0	0	0	0	0	0	0	0	0	0	0	0	0	0
13	112	055	61	1	6	5.5	5.5	1.021	1.018	1.018	0	0	0	0	0	0	0	0	0	0	0	0	0	0	0	0	0	0
14	124	056	53	1	6.5	5.5	5.5	1.008	1.004	1.007	0	0	0	0	0	0	0	0	0	0	0	0	0	0	0	0	0	0
15	086	057	56	1	7	6.5	7.5	1.012	1.024	1.024	0	0	0	0	0	0	0	0	0	0	0	0	0	0	0	0	0	0
16	091	058	22	2	6	5.5	6	1.03	1.024	1.025	1	0	0	0	0	0	0	0	0	0	0	1	0	0	0	3	0	0
17	115	059	57	1	5.5	5.5	5.5	1.015	1.008	1.018	0	0	0	0	0	0	0	0	0	0	0	0	0	0	0	0	0	0
18	122	060	27	1	7	6.5	6	1.021	1.004	1.005	0	0	0	0	0	0	0	0	0	0	0	0	0	0	0	0	0	0
19	099	061	60	1	5.5	6.5	7	1.023	1.025	1.018	0	1	0	0	0	0	0	0	0	0	0	0	0	0	0	0	0	0
20	106	062	61	2	5.5	5.5	7	1.014	1.01	1.01	0	0	0	0	0	0	0	0	0	0	0	0	0	0	0	0	0	0
21	108	063	20	2	5	5	5	1.02	1.019	1.025	0	0	0	0	0	0	0	0	0	0	0	0	0	0	0	0	0	0
22	110	064	23	2	5.5	7.5	7	1.024	1.016	1.025	0	0	1	0	0	0	0	0	0	0	0	0	0	0	0	0	0	0
23	113	065	56	2	6	5.5	5.5	1.005	1.015	1.018	0	0	0	0	0	0	0	0	0	0	0	0	0	0	0	0	0	0
24	120	066	56	2	5.5	5.5	5.5	1.007	1.01	1.008	0	0	0	0	0	0	0	0	0	0	0	0	0	0	0	0	0	0
25	123	067	51	2	6	6.5	5.5	1.007	1.006	1.006	0	0	0	0	0	0	0	0	0	0	0	0	0	0	0	0	0	0
26	125	068	64	1	7	7	6.5	1.009	1.01	1.011	0	0	0	0	0	0	0	0	0	0	0	0	0	0	0	0	0	0
27	118	069	61	1	5.5	6.5	6	1.015	1.016	1.018	0	0	0	0	0	0	0	0	0	0	0	0	0	0	0	0	0	0
28	119	070	56	1	7	5	5.5	1.011	1.018	1.026	0	0	1	0	0	0	0	0	0	0	0	1	0	0	0	0	0	0

## Sheet:  Urine1
	CODE		Background information		Urinalysis
					pH			specific gravity			Protein qualitative			Sugar qualitative			Urobilinogen			Occult blood reaction			biliruline			ketone bodies
					5.0-7.5			1.005 to 1.030			-			-			±			-			-			-
item number	0W ID	Main exam ID	age	sex1=male 2=female	0W	8W	12W	0W	8W	12W	0W	8W	12W	0W	8W	12W	0W	8W	12W	0W	8W	12W	0W	8W	12W	0W	8W	12W
1	025	001	56	2	5.5	5.5	5.5	1.024	1.02	1.028	0	1	1	0	0	0	0	0	0	0	0	0	0	0	0	0	0	0
2	039	002	39	1	5.5	6	-	1.027	1.027	-	1	1	-	0	0	-	0	0	-	0	0	-	0	0	-	0	0	-
3	048	003	20	1	6.5	6	6	1.03	1.033	1.022	1	1	0	0	0	0	0	0	0	0	0	0	0	0	0	0	0	0
4	079	004	50	2	5.5	5.5	7	1.019	1.023	1.023	1	1	0	0	0	0	0	0	0	0	0	0	0	0	0	0	0	0
5	018	005	38	2	5	5.5	5.5	1.007	1.011	1.007	0	0	0	0	0	0	0	0	0	0	0	1	0	0	0	3	0	0
6	046	006	34	2	6	-	-	1.017	-	-	0	-	-	0	-	-	0	-	-	0	-	-	0	-	-	0	-	-
7	036	007	45	2	5.5	6.5	6	1.026	1.024	1.013	0	0	0	0	0	0	0	0	0	0	0	0	0	0	0	0	0	0
8	032	008	47	2	7	5.5	6	1.005	1.021	1.026	0	0	0	0	0	0	0	0	0	0	1	4	0	0	0	0	0	0
9	052	009	33	1	6	6.5	5.5	1.018	1.026	1.027	0	0	0	0	0	0	0	0	0	0	0	0	0	0	0	0	0	0
10	059	010	22	2	5.5	6	5.5	1.023	1.034	1.027	0	1	0	0	0	0	0	0	0	0	0	0	0	0	0	0	0	0
11	068	011	52	2	5.5	5.5	5.5	1.022	1.031	1.03	0	1	2	0	0	0	0	0	0	0	0	0	0	0	0	0	0	0
12	041	012	44	1	7.5	6.5	6.5	1.023	1.016	1.018	0	0	0	0	0	0	0	0	0	0	0	0	0	0	0	0	0	0
13	043	013	44	1	5.5	5.5	5.5	1.029	1.028	1.023	1	0	1	0	0	0	0	0	0	0	0	0	0	0	0	0	0	0
14	063	014	33	2	5.5	5.5	5.5	1.025	1.02	1.015	0	1	0	0	0	0	0	0	0	0	0	2	0	0	0	2	0	0
15	065	015	35	2	6	6	6	1.011	1.015	1.024	0	0	1	0	0	0	0	0	0	0	0	4	0	0	0	0	0	0
16	078	016	38	2	5.5	5.5	5	1.022	1.011	1.026	0	0	1	0	0	0	0	0	0	0	0	0	0	0	0	0	0	0
17	031	017	28	2	6	-	-	1.005	-	-	0	-	-	0	-	-	0	-	-	0	-	-	0	-	-	0	-	-
18	054	018	45	2	6	7.5	5.5	1.01	1.008	1.008	0	0	0	0	0	0	0	0	0	0	1	0	0	0	0	0	0	0
19	070	019	31	1	6	5.5	6	1.007	1.006	1.03	0	0	0	0	0	0	0	0	0	0	0	0	0	0	0	0	0	0
20	072	020	48	2	7.5	6	6	1.009	1.024	1.009	0	0	0	0	0	0	0	0	0	1	1	0	0	0	0	0	0	0
21	076	021	45	2	6	7.5	7.5	1.002	1.008	1.013	0	0	0	0	0	0	0	0	0	0	4	0	0	0	0	0	0	0
22	027	022	36	1	6	7	5.5	1.009	1.008	1.013	0	0	0	0	0	0	0	0	0	0	0	0	0	0	0	0	0	0
23	028	023	34	1	5.5	5.5	6	1.02	1.024	1.016	0	0	0	0	0	0	0	0	0	0	0	0	0	0	0	0	0	0
24	014	024	40	1	5	7	5.5	1.007	1.006	1.005	0	0	0	0	0	0	0	0	0	0	0	0	0	0	0	0	0	0
25	067	025	32	2	6.5	6	6	1.01	1.025	1.012	0	0	0	0	0	0	0	0	0	0	0	0	0	0	0	0	0	0
26	074	026	44	2	7	7	7	1.009	1.005	1.015	0	0	0	0	0	0	0	0	0	0	0	0	0	0	0	0	0	0
27	021	027	36	2	6	7	7	1.013	1.012	1.027	0	0	0	0	0	0	0	0	0	0	0	0	0	0	0	0	0	0
28	026	028	53	1	7.5	6	7	1.005	1.005	1.003	0	0	0	0	0	0	0	0	0	0	0	0	0	0	0	0	0	0
29	019	029	49	1	7	6	5.5	1.016	1.014	1.012	0	0	0	0	0	0	0	0	0	0	0	0	0	0	0	0	0	0
30	071	030	29	2	5.5	6	6	1.007	1.007	1.005	0	0	0	0	0	0	0	0	0	3	3	0	0	0	0	0	0	0
31	022	031	26	1	6	6.5	6	1.012	1.025	1.015	0	1	0	0	0	0	0	0	0	0	0	0	0	0	0	0	0	0
32	034	032	35	2	6.5	-	-	1.023	-	-	0	-	-	0	-	-	0	-	-	0	-	-	0	-	-	0	-	-
33	035	033	27	2	5.5	5.5	5.5	1.008	1.017	1.03	0	0	1	0	0	0	0	0	0	0	0	0	0	0	0	0	0	0
34	042	034	32	1	5.5	5.5	5.5	1.008	1.03	1.009	0	1	0	0	0	0	0	0	0	0	0	0	0	0	0	0	0	0
35	044	035	40	2	7.5	6	6	1.008	1.011	1.028	0	0	0	0	0	0	0	0	0	0	0	0	0	0	0	0	0	0
36	061	036	39	2	7	5.5	6	1.02	1.024	1.018	0	0	1	0	0	0	0	0	0	4	0	4	0	0	0	0	0	0
37	064	037	42	2	5	5.5	5	1.016	1.022	1.02	0	0	0	0	0	0	0	0	0	0	0	0	0	0	0	0	0	0
38	008	038	36	2	6	7.5	6	1.013	1.012	1.025	0	0	1	0	0	0	0	0	0	0	0	0	0	0	0	0	0	0
39	016	039	47	2	5.5	5.5	6	1.022	1.011	1.009	0	0	0	0	0	0	0	0	0	1	2	0	0	0	0	0	0	0
40	040	040	20	1	6	7	7	1.021	1.023	1.019	0	0	0	0	0	0	0	0	0	0	0	0	0	0	0	0	0	0
41	051	041	59	2	6	6.5	5.5	1.01	1.004	1.011	0	0	0	0	0	0	0	0	0	0	0	0	0	0	0	0	0	0
42	077	042	42	1	7.5	7	5.5	1.016	1.028	1.024	0	0	0	0	0	0	0	0	0	0	0	0	0	0	0	0	0	0

## Sheet:  Blood 1
	CODE		Background information		Hematology test
					WBC (white blood cell count)			RBC (red blood cell count)			Hb (hemoglobin)	M=13.5～17.6F=11.3～15.2		Ht (hematocrit value)	M=39.8~51.8F=33.4~44.9		MCV			MCHMore			MCHC			PLT (platelet count)	13.0 to 36.9	13.0 to 36.9
					/µL	/µL		×10^4/µL	×10^4/µL		g/dL	g/dL		%	%		fl			pg			%			×10^4/µL	×10^4/µL	×10^4/µL
					M=3900～9800 F=3500～9100			M=427～570 F=376～500			M=13.5～17.6F=11.3～15.2			M=39.8~51.8F=33.4~44.9			M=82.7~101.6 F=79.0~100.0			M=28.0~34.6F=26.3~34.3			M=31.6～36.6 F=30.7～36.6			M13.1~36.2 F=13.0~36.9
item number	0W ID	Main exam ID	age	sex1=male 2=female	0W	8W	12W	0W	8W	12W	0W	8W	12W	0W	8W	12W	0W	8W	12W	0W	8W	12W	0W	8W	12W	0W	8W	12W
1	025	001	56	2	6200	5200	6000	411	421	411	12.4	12.7	12.2	38.5	39.5	39.4	93.7	93.8	95.9	30.2	30.2	29.7	32.2	32.2	31	27.2	25.5	22.9
2	039	002	39	1	5100	5300	-	516	478	-	15.5	14.4	-	47.8	43.7	-	92.6	91.4	-	30	30.1	-	32.4	33	-	20.7	21.1	-
3	048	003	20	1	7000	5500	4800	535	547	496	15.2	15.7	14.4	46.9	47.7	43.6	87.7	87.2	87.9	28.4	28.7	29	32.4	32.9	33	24.6	23.6	23.2
4	079	004	50	2	4300	4800	2000	491	467	477	14.9	13.8	14	45.9	44.4	45.9	93.5	95.1	96.2	30.3	29.6	29.4	32.5	31.1	30.5	19.4	21	17.9
5	018	005	38	2	5900	6200	4100	418	419	471	13.3	13.3	14.7	40	40.8	44.8	95.7	97.4	95.1	31.8	31.7	31.2	33.3	32.6	32.8	24.9	20.9	24.4
6	046	006	34	2	6500	-	-	455	-	-	13.2	-	-	41.2	-	-	90.5	-	-	29	-	-	32	-	-	23.4	-	-
7	036	007	45	2	3500	3700	4300	394	382	377	12.7	12.2	12	38.4	37.4	37.2	97.5	97.9	98.7	32.2	31.9	31.8	33.1	32.6	32.3	11.3	9.7	15.4
8	032	008	47	2	7000	6700	7400	431	437	436	12.9	12.7	12.9	39.1	40.3	39.5	90.7	92.2	90.6	29.9	29.1	29.6	33	31.5	32.7	35.5	34.1	34.7
9	052	009	33	1	8400	6700	5500	558	540	543	15.7	15.2	15.5	49.1	47.2	48.4	88	87.4	89.1	28.1	28.1	28.5	32	32.2	32	24.5	27.8	25.6
10	059	010	22	2	5800	5100	4700	459	463	462	13.3	13.2	13.3	40.4	41.5	41.4	88	89.6	89.6	29	28.5	28.8	32.9	31.8	32.1	27.6	26.3	25.4
11	068	011	52	2	4200	5500	6400	521	496	483	14	13.6	13.4	44.5	43	42.5	85.4	86.7	88	26.9	27.4	27.7	31.5	31.6	31.5	24.1	25.8	28.2
12	041	012	44	1	4000	4000	2800	462	467	444	12.3	12.8	11.5	41.1	41.2	39.5	89	88.2	89	26.6	27.4	25.9	29.9	31.1	29.1	47.9	48	45.5
13	043	013	44	1	4500	5300	3900	527	491	510	16.4	15.5	16.2	50.4	47	48.7	95.6	95.7	95.5	31.1	31.6	31.8	32.5	33	33.3	25.4	22.1	20.8
14	063	014	33	2	5500	3400	5100	479	454	462	13.6	12.6	12.6	42.7	40.3	40.6	89.1	88.8	87.9	28.4	27.8	27.3	31.9	31.3	31	29.6	31.9	30.9
15	065	015	35	2	5700	5800	5200	476	486	457	13.9	14.2	12.8	42.4	42.8	40.8	89.1	88.1	89.3	29.2	29.2	28	32.8	33.2	31.4	30.2	37.6	33.3
16	078	016	38	2	7900	5500	5900	464	422	429	14.6	13	13.4	44.1	40	40.5	95	94.8	94.4	31.5	30.8	31.2	33.1	32.5	33.1	28.5	22.5	24.6
17	031	017	28	2	6600	-	-	454	-	-	14.6	-	-	42.8	-	-	94.3	-	-	32.2	-	-	34.1	-	-	27.1	-	-
18	054	018	45	2	9400	7800	9300	448	475	461	12.3	13.4	12.8	38.9	41.9	40.3	86.8	88.2	87.4	27.5	28.2	27.8	31.6	32	31.8	24.7	28.1	24.8
19	070	019	31	1	5700	4300	4500	466	452	449	13.7	12.7	12.3	41.7	39.9	39.2	89.5	88.3	87.3	29.4	28.1	27.4	32.9	31.8	31.4	28.1	24.4	28.1
20	072	020	48	2	4600	7900	6000	428	445	442	13.5	14.3	14	41.7	43.4	42.4	97.4	97.5	95.9	31.5	32.1	31.7	32.4	32.9	33	24.8	22.5	20.9
21	076	021	45	2	5600	6900	5700	450	464	460	13.4	14.1	13.8	40.5	42.1	42.1	90	90.7	91.5	29.8	30.4	30	33.1	33.5	32.8	29.4	32	26.5
22	027	022	36	1	2700	3700	2600	457	452	450	13.5	13	13	42.7	41.2	42	93.4	91.2	93.3	29.5	28.8	28.9	31.6	31.6	31	16.4	15.4	12.6
23	028	023	34	1	4400	4900	5000	515	519	519	14.7	14.9	14.8	44.4	44.3	44.7	86.2	85.4	86.1	28.5	28.7	28.5	33.1	33.6	33.1	16.3	18.5	19.4
24	014	024	40	1	6500	7200	7400	447	442	459	13.9	13.5	14.2	43.1	42.6	43.4	96.4	96.4	94.6	31.1	30.5	30.9	32.3	31.7	32.7	28.3	26.8	27.9
25	067	025	32	2	5300	7900	5900	436	462	478	13.1	13.4	13.7	39.7	41.4	43	91.1	89.6	90	30	29	28.7	33	32.4	31.9	26.6	23.6	24.6
26	074	026	44	2	4100	4500	4700	361	348	380	12.7	11.9	13	38.8	35.7	39.3	107.5	102.6	103.4	35.2	34.2	34.2	32.7	33.3	33.1	20.5	20.8	22
27	021	027	36	2	5400	4900	3200	409	416	415	12.3	12	11.7	38.4	38.5	38.7	93.9	92.5	93.3	30.1	28.8	28.2	32	31.2	30.2	19.9	21.4	22.3
28	026	028	53	1	4600	4000	3400	471	473	458	14.7	14.6	13.9	45.2	45.3	44.4	96	95.8	96.9	31.2	30.9	30.3	32.5	32.2	31.3	24.7	25.6	24.1
29	019	029	49	1	3900	5200	5100	414	427	435	14.4	14.3	14.8	42.9	43.5	44.4	103.6	101.9	102.1	34.8	33.5	34	33.6	32.9	33.3	19.2	19	22.5
30	071	030	29	2	5700	8400	6800	487	470	482	14.6	14	14.1	45.1	42.4	43.9	92.6	90.2	91.1	30	29.8	29.3	32.4	33	32.1	26.1	25.3	24.7
31	022	031	26	1	3700	3500	4000	554	591	539	16.7	17.6	16.1	49.7	52.8	49.2	89.7	89.3	91.3	30.1	29.8	29.9	33.6	33.3	32.7	24.6	25.7	24.1
32	034	032	35	2	2900	-	-	388	-	-	12.7	-	-	38.3	-	-	98.7	-	-	32.7	-	-	33.2	-	-	24.9	-	-
33	035	033	27	2	5900	5900	5900	485	501	508	12.8	14	13.9	41.5	43.6	44.3	85.6	87	87.2	26.4	27.9	27.4	30.8	32.1	31.4	19.2	17.4	16.4
34	042	034	32	1	5000	6100	5800	561	574	553	15.8	16.1	15.3	46.6	47.6	46.4	83.1	82.9	83.9	28.2	28	27.7	33.9	33.8	33	28.6	29.3	30.6
35	044	035	40	2	4300	3400	2300	478	438	450	14.2	13.1	12.9	43.6	40.1	41.9	91.2	91.6	93.1	29.7	29.9	28.7	32.6	32.7	30.8	21.6	18.6	20
36	061	036	39	2	4500	4900	4600	429	430	435	13.3	13	13	40.3	39.1	40.2	93.9	90.9	92.4	31	30.2	29.9	33	33.2	32.3	24.2	25.3	22.8
37	064	037	42	2	4700	4900	4100	419	419	449	12	11.4	12	37.4	35.9	38.5	89.3	85.7	85.7	28.6	27.2	26.7	32.1	31.8	31.2	24.4	25.6	22.5
38	008	038	36	2	4800	5700	5300	478	470	466	14.7	14.6	14	44.7	42.9	42.8	93.5	91.3	91.8	30.8	31.1	30	32.9	34	32.7	26.4	24.9	24.2
39	016	039	47	2	7200	6400	6200	529	510	509	13.9	13.3	13	43.8	42.1	42.2	82.8	82.5	82.9	26.3	26.1	25.5	31.7	31.6	30.8	23.7	24.5	25.1
40	040	040	20	1	5900	5400	8300	500	502	502	15.1	15.2	15.1	44.9	44.7	44.3	89.8	89	88.2	30.2	30.3	30.1	33.6	34	34.1	27.1	28.7	25.2
41	051	041	59	2	5300	4900	5100	389	408	409	11.9	12.4	12.4	37.6	39.2	38.6	96.7	96.1	94.4	30.6	30.4	30.3	31.6	31.6	32.1	12.9	13.9	11.6
42	077	042	42	1	7800	4600	6100	495	484	499	15.1	14.9	14.8	44.8	43.6	44.7	90.5	90.1	89.6	30.5	30.8	29.7	33.7	34.2	33.1	29.7	28.4	27.7

## Sheet:  Biochem1
	CODE		Background information		Specimen information						biochemical test
											TG			T-cho			BUN (urea nitrogen)			T-Bil (total bilirubin)			TP (total protein)			Alb (albumin)			ALP			LDH			γ-GTP			AST			ALT			Crea (creatinine)			UA
					Hemolysis			chyle			mg/dL			mg/dL			mg/dL			mg/dL			g/dL			mg/dL			U/L			U/L			U/L			U/L			U/L			mg/dL			mg/dL
											50 to 149			150 to 219			8.0 to 22.0			0.3 to 1.2			6.7-8.3			3.8-5.2			115-359			115 to 245			M=70 or less F=30 or less			10 to 40			5 to 40			M=0.61～1.04 F=0.47～0.79			M=3.7～7.0 F=2.5～7.0
item number	SCR ID	Main exam ID	age	sex1=male 2=female	0W	8W	12W	0W	8W	12W	0W	8W	12W	0W	8W	12W	0W	8W	12W	0W	8W	12W	0W	8W	12W	0W	8W	12W	0W	8W	12W	0W	8W	12W	0W	8W	12W	0W	8W	12W	0W	8W	12W	0W	8W	12W	0W	8W	12W
1	025	001	56	2	-	-	-	-	-	-	44	46	43	234	253	247	16.9	11.9	13.2	0.6	0.8	0.6	7.4	7.5	7.4	4.2	4.3	4.2	182	179	177	151	157	158	12	13	16	22	24	21	13	12	12	0.71	0.69	0.63	4.5	4.5	3.6
2	039	002	39	1	-	-	-	-	-	-	80	103	-	212	208	-	10.2	13.6	-	0.5	0.5	-	7.7	7.5	-	5.1	4.9	-	222	228	-	185	149	-	14	15	-	16	20	-	16	23	-	0.71	0.7	-	4.7	4	-
3	048	003	20	1	-	-	-	-	-	-	55	74	41	170	221	211	13	17.6	14.8	1.6	2	1.1	7.9	7.9	7.4	5.3	5.4	5.1	194	192	169	280	169	152	18	17	15	37	22	19	48	19	15	0.89	0.96	0.81	7.8	7.5	6.5
4	079	004	50	2	-	-	-	-	-	-	32	37	52	216	210	231	15	15.8	17.2	2.4	1.3	1.2	7.7	7.2	7.5	5	4.6	4.9	216	222	230	206	205	209	17	17	18	27	28	31	12	10	12	0.59	0.61	0.54	4.3	4.3	3.4
5	018	005	38	2	-	-	-	-	-	-	37	61	37	185	204	207	16.2	15.7	16.3	0.9	0.9	0.6	7.2	7.4	7.5	4.7	4.8	4.8	177	216	239	141	141	130	15	16	15	21	36	20	18	52	18	0.6	0.54	0.53	5.4	4.3	3.6
6	046	006	34	2	-	-	-	-	-	-	64	-	-	174	-	-	9	-	-	0.6	-	-	7.3	-	-	4.8	-	-	120	-	-	174	-	-	14	-	-	20	-	-	13	-	-	0.71	-	-	5.3	-	-
7	036	007	45	2	-	-	-	-	-	-	36	39	31	213	193	191	11.8	11	12.2	0.7	0.6	0.6	7.3	6.8	7	4.4	4.1	4	171	228	178	149	139	147	14	12	16	21	19	20	12	11	12	0.56	0.55	0.56	4.5	3.6	3.9
8	032	008	47	2	-	-	-	-	-	-	33	29	36	163	166	165	9.2	12.6	13.6	0.9	0.7	0.5	7	7	7.1	4.2	4.2	4.1	205	213	218	155	155	155	17	17	16	20	21	21	12	13	13	0.59	0.55	0.56	5.4	4.6	4.4
9	052	009	33	1	-	-	-	-	-	-	47	37	74	159	161	161	11	13.3	16.8	0.8	0.5	0.8	7.4	7.3	7.5	4.7	4.4	4.6	258	256	218	157	152	154	38	33	26	23	24	20	25	28	21	0.81	0.76	0.76	5.7	6.6	7.2
10	059	010	22	2	-	-	-	-	-	-	45	47	60	158	172	164	10.8	13.1	12.3	1.1	0.7	0.8	7.3	7.3	7.2	4.5	4.5	4.3	199	195	191	162	150	143	12	10	11	18	14	12	15	13	9	0.73	0.66	0.69	3.9	3.3	3.7
11	068	011	52	2	-	-	-	-	-	-	71	47	63	209	215	211	14.9	16.9	16.1	0.7	0.9	0.7	7.9	7.7	7.3	5	4.7	4.4	258	260	257	253	256	241	10	9	10	22	24	18	17	18	15	0.6	0.64	0.72	3.1	3.8	3.6
12	041	012	44	1	-	-	-	-	-	-	53	66	34	203	211	217	12.9	15.2	12.9	0.5	0.4	0.4	7	6.7	6.9	4.5	4.2	4.2	342	340	352	195	174	177	22	16	20	17	24	21	12	25	17	0.85	0.93	0.89	4	5.1	4.7
13	043	013	44	1	-	-	-	-	-	-	60	35	42	185	175	163	15.4	16.9	17.4	1.4	1.4	1.1	8.5	7.7	7.6	5.7	5.1	4.9	171	150	142	161	159	149	18	16	15	24	23	20	20	20	14	0.79	0.74	0.77	6.2	6.5	5.9
14	063	014	33	2	-	-	-	-	-	-	52	55	67	200	203	205	9.4	11.5	13.2	0.9	0.6	0.7	8	7.6	7.9	4.7	4.5	4.7	150	141	160	183	166	181	16	12	15	23	22	23	12	12	13	0.64	0.58	0.58	3.8	3.9	3.5
15	065	015	35	2	-	-	-	-	-	-	46	63	55	183	192	190	7.3	9.4	9.9	1.1	1	1.2	7.7	7.3	7.3	4.6	4.4	4.3	194	151	138	155	146	146	11	14	13	18	19	19	7	9	9	0.57	0.54	0.53	4.2	4	3.7
16	078	016	38	2	-	-	-	-	-	-	94	72	58	113	115	105	13.6	10	11.9	0.8	0.8	0.7	8.8	8	8	4.8	4.4	4.3	177	161	138	139	99	106	20	24	16	18	17	14	14	16	11	0.66	0.63	0.67	4.5	4	4.1
17	031	017	28	2	-	-	-	-	-	-	69	-	-	222	-	-	6.9	-	-	0.7	-	-	8	-	-	5	-	-	147	-	-	135	-	-	15	-	-	15	-	-	9	-	-	0.46	-	-	5.2	-	-
18	054	018	45	2	-	-	-	-	-	-	69	52	51	193	215	207	6.2	6.6	5.5	0.9	0.4	0.7	7.6	7.9	7.8	4.6	4.6	4.4	156	168	128	120	135	134	98	45	36	22	25	20	30	22	15	0.48	0.43	0.46	3.4	3.2	3.2
19	070	019	31	1	-	-	-	-	-	-	124	38	86	182	202	207	9.8	14.7	14.5	0.6	0.4	0.3	7.8	7.9	7.6	4.6	4.2	4.1	190	255	236	224	207	214	12	23	13	25	25	29	21	25	24	0.87	0.75	0.87	5.8	7	6.4
20	072	020	48	2	-	-	-	-	-	-	36	39	60	162	173	173	13.7	14.8	10.2	0.9	1	0.8	7.3	7	7.2	4.3	4.3	4.2	175	164	166	171	144	145	15	14	15	21	16	21	14	12	20	0.65	0.58	0.64	4.8	5	4.5
21	076	021	45	2	-	1	-	-	-	-	50	34	56	179	204	188	8.6	9.6	9.8	1.3	1.3	1	7.5	7.6	7.1	4.6	4.6	4.2	141	193	157	186	253	178	11	11	12	21	34	32	15	27	35	0.61	0.53	0.55	4.3	3.9	3.8
22	027	022	36	1	-	-	-	-	-	-	30	55	74	157	193	170	11.6	13.3	12.2	0.7	0.7	0.6	7.2	7.3	7.3	4.7	4.7	4.5	125	120	117	166	143	143	13	17	16	18	20	19	10	15	12	0.82	0.75	0.73	5.5	5.2	4.6
23	028	023	34	1	-	-	-	-	-	-	48	93	50	167	179	172	11.6	12.5	10.7	1.1	0.9	1.2	7.1	7.3	7.3	4.7	4.7	4.9	187	204	181	151	150	154	11	11	11	16	15	17	10	9	10	0.78	0.78	0.72	4.4	3.6	3.8
24	014	024	40	1	-	-	-	-	-	-	137	180	107	203	237	213	9.6	10.2	13.2	0.7	0.4	0.4	6.8	7.2	7.7	4.5	4.7	5	190	207	216	143	146	151	25	23	23	14	16	16	10	16	14	0.77	0.79	0.84	6	4.9	7.3
25	067	025	32	2	-	-	-	-	-	-	25	30	33	179	183	187	11.1	13.9	9.6	0.8	0.6	1.2	7.3	7.1	7.5	4.5	4.4	4.6	179	190	131	161	143	148	16	15	13	18	17	15	13	11	10	0.64	0.62	0.6	4.5	4.3	4.4
26	074	026	44	2	-	-	-	-	-	-	53	75	57	237	235	258	10	12.7	11.1	0.9	0.7	0.6	7.4	6.9	7.3	4.4	4.2	4.1	178	149	151	208	190	205	32	27	28	19	18	18	12	11	12	0.75	0.71	0.74	5.9	6	5.9
27	021	027	36	2	-	-	-	-	-	-	49	41	52	195	193	192	10	10.9	11.7	0.8	0.7	0.5	6.8	7	6.8	4.3	4.3	4	164	199	244	157	167	165	25	32	37	22	25	25	14	16	13	0.6	0.62	0.57	3.1	3.6	3.1
28	026	028	53	1	-	-	-	-	-	-	46	45	44	212	225	220	8.2	8.9	7.9	0.9	1	1	7.3	7.3	7	4.6	4.6	4.2	289	300	265	180	173	170	28	31	30	22	25	21	21	25	22	0.73	0.68	0.7	4.5	4.5	4
29	019	029	49	1	-	-	-	-	-	-	95	110	134	207	223	212	11.4	12.4	12.1	0.7	0.9	0.5	7.1	7.3	7.2	4.8	4.7	4.4	140	143	150	167	164	150	22	31	24	17	21	16	11	15	10	0.8	0.77	0.78	5.8	6.3	5.7
30	071	030	29	2	-	-	-	-	-	-	52	43	52	163	143	154	9	7.8	6	0.9	0.6	0.6	8.4	8.2	7.9	5.4	5.1	4.8	247	236	219	151	149	140	12	9	9	33	15	17	45	13	20	0.65	0.62	0.59	4.6	4.2	4.4
31	022	031	26	1	-	-	-	-	-	-	47	54	46	210	221	200	10.9	13.8	15.8	1.6	1.6	1.3	8	7.9	7.5	5.3	5.1	5	171	170	154	201	207	208	24	24	23	20	25	25	21	32	27	0.76	0.78	0.73	5.8	6.7	6.5
32	034	032	35	2	-	-	-	-	-	-	49	-	-	165	-	-	11.1	-	-	0.5	-	-	6.9	-	-	4.7	-	-	115	-	-	154	-	-	24	-	-	17	-	-	12	-	-	0.65	-	-	3.8	-	-
33	035	033	27	2	-	-	-	-	-	-	55	28	52	208	202	193	8.6	9.6	10.6	0.6	0.5	0.5	8.8	8.4	8.5	4.8	4.5	4.6	169	158	154	115	108	116	13	10	11	19	21	20	10	12	11	0.58	0.54	0.6	5.3	6	5.6
34	042	034	32	1	-	-	-	-	-	-	85	117	66	158	166	152	8.7	12.8	9.4	0.9	0.4	0.5	8.3	8	8	5.3	5	4.7	178	179	190	175	172	176	23	25	23	24	30	27	33	55	44	0.76	0.76	0.78	6.5	6.8	6.3
35	044	035	40	2	-	-	-	-	-	-	64	39	39	233	257	278	8.2	12.7	11.6	0.7	0.7	0.6	7.4	6.8	6.7	5	4.8	4.4	162	116	115	139	123	126	20	15	15	17	18	17	14	15	15	0.63	0.59	0.62	4.5	5.2	5.3
36	061	036	39	2	-	-	-	-	-	-	56	47	28	244	229	248	11.4	13.3	10	0.5	0.4	0.5	8	7	7.4	4.7	4.1	4.4	134	131	111	150	138	144	15	14	13	21	18	18	15	16	10	0.57	0.51	0.56	3.8	4.8	4
37	064	037	42	2	-	-	-	-	-	-	34	34	32	175	181	196	13.8	15.4	15.9	0.7	0.7	0.6	7.7	7.2	7.5	4.4	4.1	4	111	107	109	179	177	184	14	15	18	24	20	22	24	24	28	0.57	0.55	0.56	4.2	4.6	4.3
38	008	038	36	2	-	-	-	-	-	-	38	41	30	166	164	157	10.8	9	8.8	1.1	1.3	0.9	7.8	7.6	7.4	4.7	4.5	4.5	155	139	139	135	138	136	13	12	11	17	19	17	14	16	14	0.56	0.53	0.54	4.6	4.2	3.7
39	016	039	47	2	-	-	-	-	-	-	73	45	46	244	261	263	10	8.4	11.3	0.7	0.5	0.5	7.6	7.4	7.3	4.7	4.6	4.5	96	103	95	174	170	174	11	9	11	18	24	21	12	18	15	0.53	0.53	0.55	4	3.8	3.7
40	040	040	20	1	-	-	-	-	-	-	48	58	61	217	212	217	12.7	11.3	12.6	0.7	0.4	0.6	8.4	7.7	8.2	5.3	4.9	4.9	186	181	180	173	169	174	26	23	23	23	23	28	27	30	57	0.68	0.66	0.64	4.1	4.1	4
41	051	041	59	2	-	-	-	-	-	-	106	104	89	229	229	200	9.4	13.7	13.6	0.6	0.5	0.5	6.9	6.9	6.8	4.1	4	3.9	226	244	206	172	167	151	15	36	35	23	36	25	15	29	24	0.65	0.64	0.71	5.2	4.6	5.3
42	077	042	42	1	-	-	-	-	-	-	44	28	30	168	168	157	11.8	16.2	14.8	1.6	1.5	1.1	7.6	7.2	7.5	4.9	4.6	4.7	128	124	127	148	142	146	12	12	12	15	16	15	12	13	11	0.83	0.83	0.83	5.5	4.2	4.4
[truncated: 15 more columns]
